# Supplementary material for: Synthesis, structure and optoelectronic properties of rigid 3D tetraindeno-fused spirofluorene with thioxanthene or dioxothioxanthene substitutes
Source: Royal Society of Chemistry journal article supplement (doi:10.1039/c7ce01407d), 2017-01-01
Supplement: c7ce01407d1.pdf [file c7ce01407d1.pdf]

# Synthesis, Structure and Optoelectronic Properties of Rigid 3D Tetraindeno-Fused Spirofluorene with Thioxanthene or dioxothioxanthene Substitutes

Jing Guan<sup>a</sup>, Fangyuan Zhang,<sup>b</sup> Yijiao Zhang<sup>a</sup>, Zhigang Liu<sup>b</sup>, Yanli Wu<sup>a\*</sup>, Debin Xia<sup>b\*</sup>

<sup>a</sup> Department of Organic Chemistry, College of Pharmacy, Harbin Medical University, Baojian Road 157, 150081 Harbin, P. R. China

<sup>b</sup> MIIT Key Laboratory of Critical Materials Technology for New Energy Conversion and Storage, School of Chemistry and Chemical Engineering, Harbin Institute of Technology, 150001 Harbin, P. R. China.

E-mail: [906738174@qq.com](mailto:906738174@qq.com); E-mail: [xia@hit.edu.cn](mailto:xia@hit.edu.cn)

## Table of Contents

|                                                         |    |
|---------------------------------------------------------|----|
| General experimental methods .....                      | 2  |
| Experimental Section.....                               | 2  |
| TGA curves .....                                        | 4  |
| Absorption and emission spectra .....                   | 4  |
| TD-DFT calculations .....                               | 5  |
| HR-Mass spectra.....                                    | 10 |
| <sup>1</sup> H-NMR and <sup>13</sup> C-NMR Spectra..... | 11 |
| Single crystal structure .....                          | 14 |

## General experimental methods

$^1\text{H}$  NMR and  $^{13}\text{C}$  NMR spectra were recorded in  $\text{C}_2\text{D}_2\text{Cl}_4$  or  $\text{CDCl}_3$  using a Bruker DPX 400 or 500 spectrometer. High-resolution MALDI mass spectrometry measurements were performed on a Solarix ESI-/MALDI-ICR (9.4 T) system. UV-vis absorption spectra were recorded using a Shimadzu and SPECORD S600 spectrophotometer. Photoluminescence performance was investigated by a steady-state fluorescence spectrometer FLS920 at room temperature with the scanning range between 200 nm to 800 nm. CV measurements were carried out on a computer-controlled GSTAT12 in a three-electrode cell in a DCM solution of  $\text{Bu}_4\text{NPF}_6$  (0.1 M), using glassy carbon discs as the working electrode, Pt wire as the counter electrode, Ag/AgCl electrode as the reference electrode. Thermogravimetric analysis (TGA) was carried out on Shanghai Tian Mei Balance (Ltd ZRY-2P) at a heating rate of  $10\text{ }^\circ\text{C}/\text{min}$  under nitrogen flow. Density functional theory (DFT) calculations were performed using the Gaussian 09 program, with the B3LYP hybrid functional and basis set 6-31G(d) for the ground-state geometry optimization. All reagents and starting materials were obtained from commercial suppliers and used without further purification. All reported yields are isolated yields.

## Experimental Section

**Spiro-4S:** (2-Bromophenyl)(phenyl)sulfane (2.64 g, 10 mmol) was dissolved in 40 mL dry THF, which was dropwised to a flask equipped with iodine (10 mg, 0.04 mmol) and magnesium (0.29 g, 12 mmol) at the beginning to initiate the Grignard reaction at argon atmosphere. Then, the mixture was heated to  $80\text{ }^\circ\text{C}$  for 5 h. Thereafter, **Spiro-4O** (1.9 g, 2 mmol) was added to the mixture all at once and refluxed 12 h. After cooling to room temperature, the reaction was quenched by 1M HCl (50 mL) and then extracted with DCM ( $3 \times 50\text{ mL}$ ). The combined organic solvent was removed by rotary evaporator to obtain tertiary alcohol intermediate

**Spiro-4OH**, which was used directly in the next step without purification. The resulting **Spiro-4OH** was dissolved in 100 mL acetic acid and refluxed overnight. Then the acetic acid was removed by distillation under reduced pressure. The residue was subjected to column chromatography to obtain desired pure compound as white solid (2.6 g, 80%). <sup>1</sup>H NMR (500 MHz, C<sub>2</sub>D<sub>2</sub>Cl<sub>4</sub>) δ 8.17 (s, 4H), 7.49 (d, *J* = 7.3 Hz, 8H), 7.44 (s, 4H), 7.22 (d, *J* = 7.3 Hz, 4H), 7.19 (t, *J* = 8.0 Hz, 8H), 7.12 (d, *J* = 8.1 Hz, 4H), 6.99 (s, 4H), 6.90 (t, *J* = 8.0 Hz, 8H), 6.58 (d, *J* = 7.6 Hz, 8H), 1.22 (s, 36H). <sup>13</sup>C NMR (126 MHz, C<sub>2</sub>D<sub>2</sub>Cl<sub>4</sub>): δ 155.91, 151.47, 150.17, 149.36, 141.53, 140.70, 138.68, 138.09, 131.35, 128.73, 127.25, 126.21, 126.50, 126.07, 125.85, 116.85, 116.44, 115.60, 59.85, 34.88, 31.68.

HR-MS (MALDI) *m/z* calculated for C<sub>117</sub>H<sub>89</sub>S<sub>4</sub>

[M<sup>+</sup>] 1621.5847. Found 1621.5859. Crystallographic data (CCDC deposition number): CCDC 1564493.

#### **Spiro-4SO<sub>2</sub>:**

**Spiro-4S** (1.62 g, 1.0 mmol) was dissolved in CH<sub>2</sub>Cl<sub>2</sub> (250 mL) and meta-chloroperbenzoic acid (1.73 g, 10 mmol) was added slowly. The mixture was stirred overnight. Then, the organic layer was washed with saturated NaHCO<sub>3</sub> solution (3×75 mL) and concentrated under reduced pressure. The crude product was purified by column chromatography to obtain target compound **Spiro-4SO<sub>2</sub>** with 30% yield. <sup>1</sup>H NMR (400 MHz, CDCl<sub>3</sub>) δ 8.31 (d, *J* = 7.8 Hz, 8H), 7.89 (s, 2H), 7.57 – 7.50 (m, 12H), 7.36 – 7.26 (m, 10H), 7.25 – 7.19 (m, 8H), 7.17 (d, *J* = 8.2 Hz, 4H), 6.70 (dd, *J* = 8.0, 3.2 Hz, 8H), 1.28 (s, 36H). <sup>13</sup>C NMR (100 MHz, C<sub>2</sub>D<sub>2</sub>Cl<sub>4</sub>): δ 152.64, 152.21, 150.13, 149.70, 142.21, 141.14, 140.53, 140.24, 136.78, 133.12, 129.69, 128.49, 127.09, 125.26, 123.55, 117.78, 117.04, 116.60, 57.71, 35.02, 31.68.

HR-MS (MALDI) *m/z* calculated for C<sub>117</sub>H<sub>88</sub>O<sub>8</sub>NaS<sub>4</sub>

[M<sup>+</sup>] 1771.5260. Found 1771.5273. Crystallographic data (CCDC deposition number): CCDC 1564494.

## TGA curves

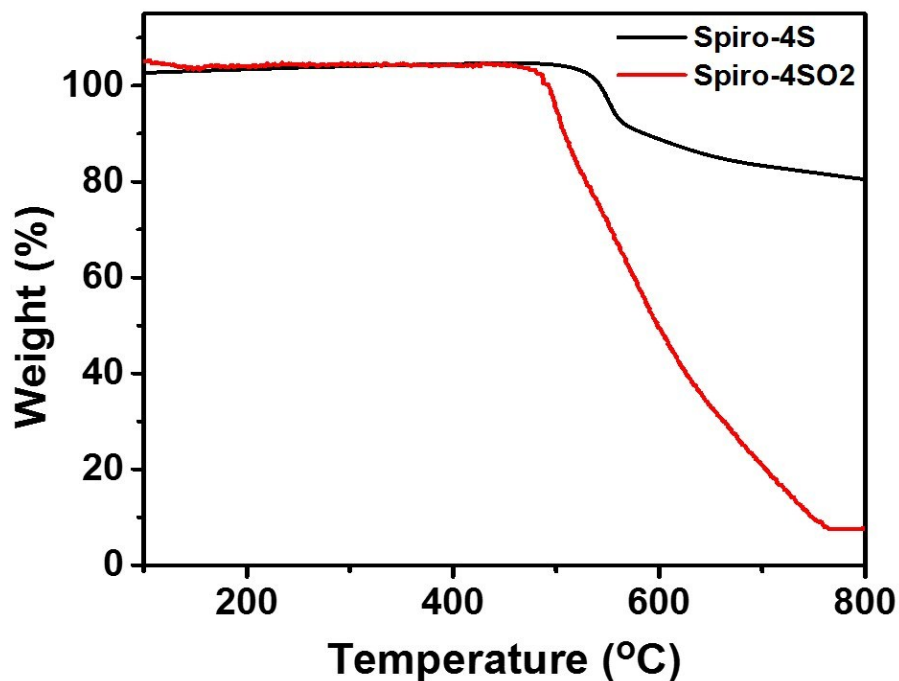

Figure S1. TGA curve for Spiro-4S and Spiro-4SO2 measured under a nitrogen atmosphere at a heating rate of 10 °C/min.

## Absorption and emission spectra

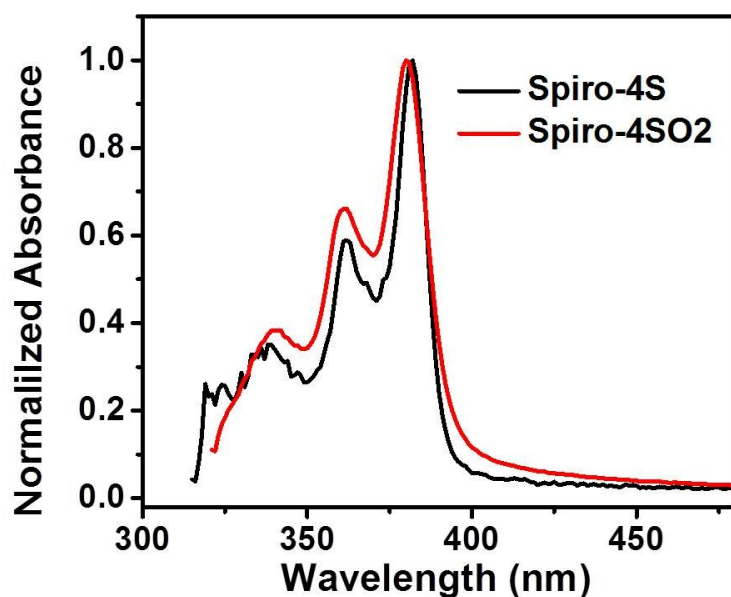

Figure S2. Absorption spectra of Spiro-4S film (black line) and Spiro-4SO2 film (red line).

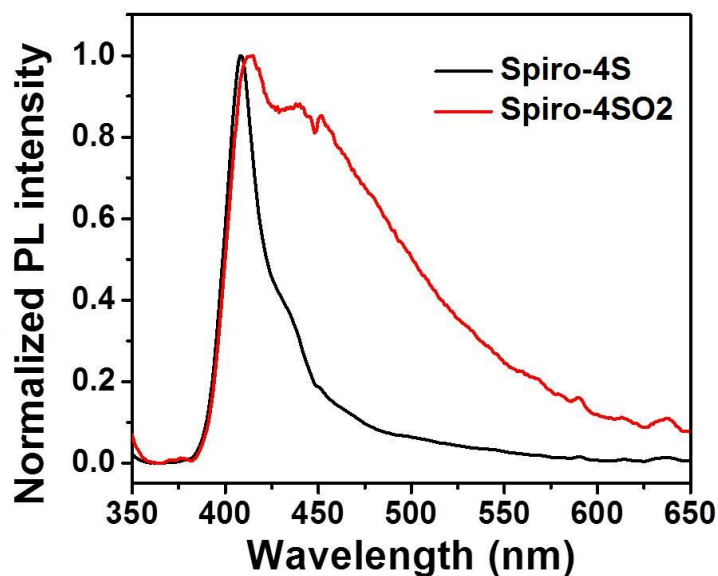

**Figure S3.** Photoluminescence spectra of **Spiro-4S** film (black line) and **Spiro-4SO2** film (red line) ( $\lambda_{\text{Exc}} = 337$  nm).

## TD-DFT calculations

**Table S1.** Calculated energy levels, oscillator strengths ( $f$ ), and orbital transition analyses of **Spiro-4S**.

|                 | $E_g$<br>(eV) | $E_g$<br>(nm) | $f$    | transition        | coefficient | transition       | coefficient |
|-----------------|---------------|---------------|--------|-------------------|-------------|------------------|-------------|
| S <sub>1</sub>  | 3.3105        | 374.52        | 0.3177 | HOMO-1 -> LUMO+1  | -0.12349    | HOMO -> LUMO     | 0.69126     |
| S <sub>2</sub>  | 3.3119        | 374.36        | 0.3166 | HOMO-1 -> LUMO    | 0.12800     | HOMO -> LUMO+1   | 0.69044     |
| S <sub>3</sub>  | 3.4712        | 357.18        | 0.7812 | HOMO-1 -> LUMO    | 0.68838     | HOMO -> LUMO+1   | -0.11914    |
| S <sub>4</sub>  | 3.4720        | 357.10        | 0.7640 | HOMO-1 -> LUMO+1  | 0.68917     | HOMO -> LUMO     | -0.11456    |
| S <sub>5</sub>  | 3.5449        | 349.76        | 0.0031 | HOMO-5 -> LUMO    | -0.10653    | HOMO-5 -> LUMO+1 | -0.15771    |
|                 |               |               |        | HOMO-4 -> LUMO    | 0.47567     | HOMO-4 -> LUMO+1 | -0.38504    |
|                 |               |               |        | HOMO-3 -> LUMO    | 0.20193     | HOMO-3 -> LUMO+1 | -0.16611    |
| S <sub>6</sub>  | 3.5449        | 349.76        | 0.0041 | HOMO-5 -> LUMO    | 0.37411     | HOMO-5 -> LUMO+1 | -0.15771    |
|                 |               |               |        | HOMO-4 -> LUMO    | 0.47567     | HOMO-4 -> LUMO+1 | 0.38504     |
|                 |               |               |        | HOMO-2 -> LUMO    | 0.21190     | HOMO-2 -> LUMO+1 | 0.25693     |
| S <sub>7</sub>  | 3.5462        | 349.62        | 0.0007 | HOMO-5 -> LUMO    | -0.22454    | HOMO-5 -> LUMO+1 | -0.26926    |
|                 |               |               |        | HOMO-2 -> LUMO    | 0.38863     | HOMO-2 -> LUMO+1 | 0.46660     |
| S <sub>8</sub>  | 3.5469        | 349.55        | 0.0014 | HOMO-4 -> LUMO    | -0.21301    | HOMO-4 -> LUMO+1 | -0.17509    |
|                 |               |               |        | HOMO-3 -> LUMO    | -0.49957    | HOMO-3 -> LUMO+1 | -0.40775    |
| S <sub>9</sub>  | 3.7180        | 333.47        | 0.0000 | HOMO-2 -> LUMO    | 0.54324     | HOMO-2 -> LUMO+1 | -0.45241    |
| S <sub>10</sub> | 3.7234        | 332.99        | 0.0000 | HOMO-3 -> LUMO    | 0.44693     | HOMO-3 -> LUMO+1 | 0.54505     |
| T <sub>1</sub>  | 2.4435        | 507.41        | 0.0000 | HOMO-1 -> LUMO    | 0.17199     | HOMO-1 -> LUMO+1 | -0.39133    |
|                 |               |               |        | HOMO -> LUMO      | 0.47352     | HOMO-1 -> LUMO+1 | -0.10830    |
| T <sub>2</sub>  | 2.4441        | 507.28        | 0.0000 | HOMO-1 -> LUMO    | -0.39260    | HOMO-1 -> LUMO+1 | -0.17229    |
|                 |               |               |        | HOMO -> LUMO      | 0.10823     | HOMO-1 -> LUMO+1 | 0.47232     |
| T <sub>3</sub>  | 3.0797        | 402.58        | 0.0000 | HOMO-1 -> LUMO+12 | 0.12500     | HOMO -> LUMO+11  | -0.15695    |
|                 |               |               |        | HOMO -> LUMO+7    | -0.25890    | HOMO-1 -> LUMO+6 | 0.25358     |
|                 |               |               |        | HOMO-5 -> LUMO+1  | 0.11660     | HOMO+7 -> LUMO+1 | -0.11030    |
|                 |               |               |        | HOMO-9 -> LUMO+1  | -0.22035    | HOMO-4 -> LUMO   | 0.19700     |
|                 |               |               |        | HOMO-6 -> LUMO    | -0.12317    | HOMO-8 -> LUMO   | 0.20252     |

|                 |        |        |        |                   |          |                   |          |
|-----------------|--------|--------|--------|-------------------|----------|-------------------|----------|
| T <sub>4</sub>  | 3.0868 | 401.66 | 0.0000 | HOMO -> LUMO+12   | -0.12501 | HOMO -> LUMO+7    | -0.13573 |
|                 |        |        |        | HOMO-1 -> LUMO+11 | 0.15804  | HOMO-1 -> LUMO+7  | 0.23518  |
|                 |        |        |        | HOMO -> LUMO+6    | -0.23913 | HOMO-1 -> LUMO+6  | -0.14456 |
|                 |        |        |        | HOMO-4-> LUMO+1   | 0.17575  | HOMO-6-> LUMO+1   | -0.12211 |
|                 |        |        |        | HOMO-8-> LUMO+1   | 0.19920  | HOMO-5-> LUMO     | 0.12549  |
|                 |        |        |        | HOMO-7-> LUMO     | -0.11133 | HOMO-9-> LUMO     | -0.22235 |
| T <sub>5</sub>  | 3.3469 | 370.45 | 0.0000 | HOMO-> LUMO+1     | 0.48402  | HOMO-1-> LUMO+1   | 0.12993  |
|                 |        |        |        | HOMO-> LUMO       | 0.47658  |                   |          |
| T <sub>6</sub>  | 3.3472 | 370.42 | 0.0000 | HOMO-> LUMO+1     | 0.48402  | HOMO-1-> LUMO+1   | 0.12993  |
|                 |        |        |        | HOMO-1-> LUMO     | 0.47996  |                   |          |
| T <sub>7</sub>  | 3.3794 | 366.88 | 0.0000 | HOMO-22-> LUMO+22 | -0.12611 | HOMO-> LUMO+3     | -0.13338 |
|                 |        |        |        | HOMO-16-> LUMO+16 | 0.12541  | HOMO-1-> LUMO+3   | 0.10925  |
|                 |        |        |        | HOMO-2-> LUMO+3   | 0.10145  | HOMO-4-> LUMO+3   | 0.18698  |
|                 |        |        |        | HOMO-5-> LUMO+3   | 0.22265  | HOMO-6-> LUMO+3   | 0.18134  |
|                 |        |        |        | HOMO-7-> LUMO+3   | 0.31151  | HOMO-20-> LUMO+3  | 0.12045  |
|                 |        |        |        | HOMO-22-> LUMO+3  | -0.15345 |                   |          |
| T <sub>8</sub>  | 3.3799 | 366.82 | 0.0000 | HOMO-13-> LUMO+26 | 0.10209  | HOMO-22-> LUMO+23 | -0.11022 |
|                 |        |        |        | HOMO-23-> LUMO+23 | 0.14539  | HOMO-17-> LUMO+17 | -0.13034 |
|                 |        |        |        | HOMO-> LUMO+2     | 0.11145  | HOMO-1-> LUMO+2   | 0.13461  |
|                 |        |        |        | HOMO-3-> LUMO+2   | 0.10226  | HOMO-4-> LUMO+2   | 0.17166  |
|                 |        |        |        | HOMO-5-> LUMO+2   | -0.22416 | HOMO-6-> LUMO+2   | 0.33338  |
|                 |        |        |        | HOMO-7-> LUMO+2   | -0.16043 | HOMO-14-> LUMO+2  | 0.12196  |
| T <sub>9</sub>  | 3.3828 | 366.52 | 0.0000 | HOMO-21-> LUMO+23 | 0.16543  | HOMO-17-> LUMO+18 | 0.10731  |
|                 |        |        |        | HOMO-18-> LUMO+18 | 0.10271  | HOMO-1-> LUMO+5   | 0.10279  |
|                 |        |        |        | HOMO-4-> LUMO+5   | -0.20299 | HOMO-5-> LUMO+5   | 0.24414  |
|                 |        |        |        | HOMO-6-> LUMO+5   | 0.17506  | HOMO-7-> LUMO+5   | -0.12076 |
|                 |        |        |        | HOMO-8-> LUMO+5   | 0.24816  | HOMO-9-> LUMO+5   | 0.16816  |
|                 |        |        |        | HOMO-14-> LUMO+5  | -0.11288 | HOMO-17-> LUMO+5  | -0.11834 |
| T <sub>10</sub> | 3.3842 | 366.36 | 0.0000 | HOMO-20-> LUMO+23 | -0.11720 | HOMO-20-> LUMO+22 | -0.1370  |
|                 |        |        |        | HOMO-> LUMO+5     | 0.10338  | HOMO-4-> LUMO+5   | 0.19693  |
|                 |        |        |        | HOMO-5-> LUMO+5   | 0.23384  | HOMO-7-> LUMO+5   | -0.21037 |
|                 |        |        |        | HOMO-8-> LUMO+5   | -0.22916 | HOMO-9-> LUMO+5   | 0.19038  |
|                 |        |        |        | HOMO-14-> LUMO+5  | 0.11312  | HOMO-16-> LUMO+5  | 0.10850  |

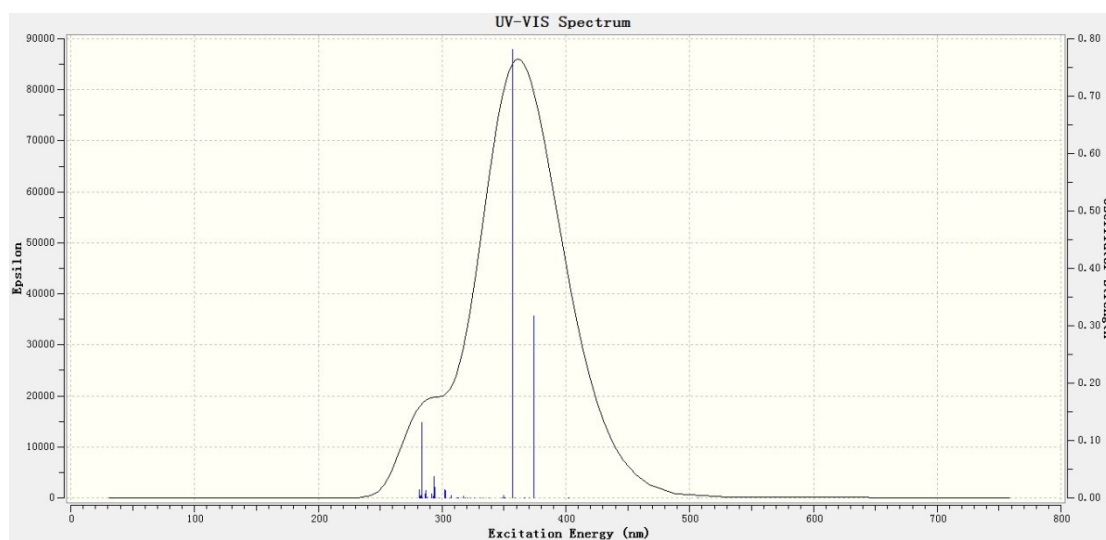

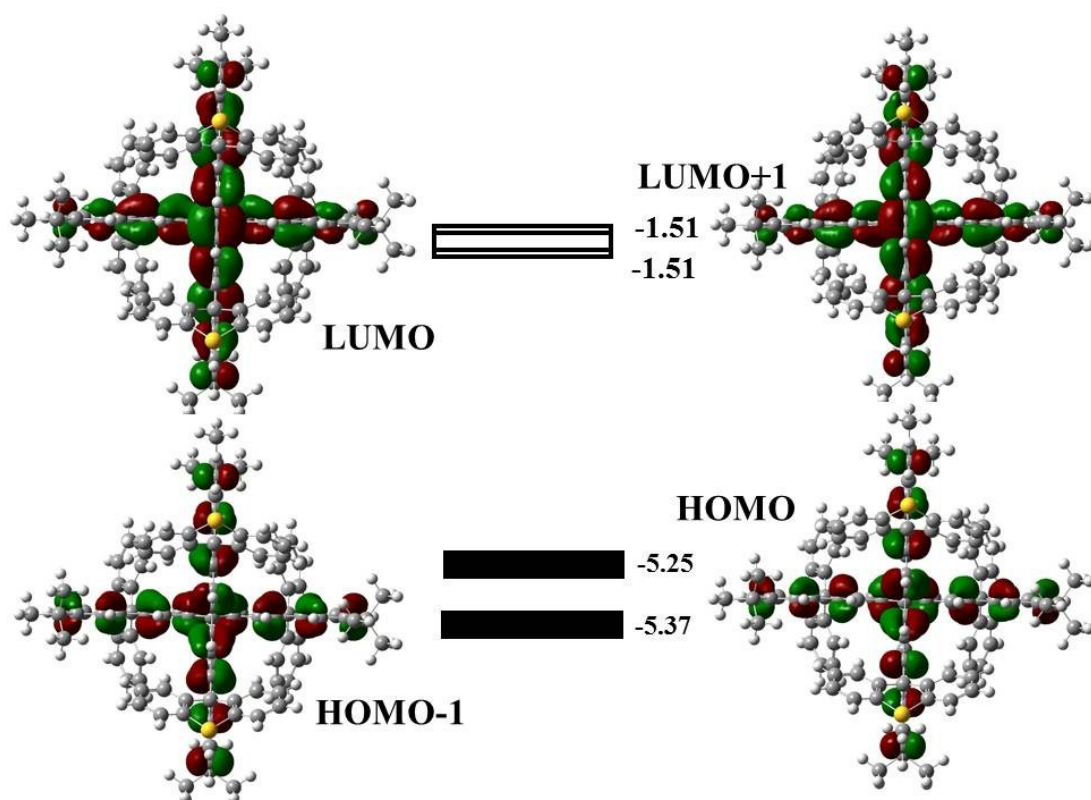

| Excited State 1           | Excited State 2           | Excited State 3           | Excited State 4           |
|---------------------------|---------------------------|---------------------------|---------------------------|
| Energy: 3.31              | Energy: 3.31              | Energy: 3.47              | Energy: 3.47              |
| Wavelength: 374.52 nm     | Wavelength: 374.36 nm     | Wavelength: 357.18 nm     | Wavelength: 357.10 nm     |
| Oscillator strength: 0.32 | Oscillator strength: 0.32 | Oscillator strength: 0.78 | Oscillator strength: 0.76 |
| Configurations:           | Configurations:           | Configurations:           | Configurations:           |
| HOMO-1→LUMO+1             | HOMO-1→LUMO               | HOMO-1→LUMO               | HOMO-1→LUMO+1             |
| HOMO→LUMO                 | HOMO→LUMO+1               | HOMO→LUMO+1               | HOMO→LUMO                 |

**Figure S4.** Calculated absorption spectrum of **Spiro-4S** (up); molecular orbitals and their energy levels (in eV) of **Spiro-4S**, as well as some major excitations calculated by TD-DFT at the B3LYP6-31G(d) level.

**Table S2.** Calculated energy levels, oscillator strengths ( $f$ ), and orbital transition analyses of **Spiro-SO2**.

|                | $E_g$<br>(eV) | $E_g$<br>(nm) | $f$    | transition       | coefficie<br>nt | transition     | coefficient |
|----------------|---------------|---------------|--------|------------------|-----------------|----------------|-------------|
| S <sub>1</sub> | 3.2731        | 378.80        | 0.2110 | HOMO-1 -> LUMO   | -0.10058        | HOMO -> LUMO   | 0.69620     |
| S <sub>2</sub> | 3.3260        | 372.77        | 0.4215 | HOMO-1 -> LUMO+1 | 0.15199         | HOMO -> LUMO+1 | 0.68587     |
| S <sub>3</sub> | 3.4537        | 358.99        | 0.8813 | HOMO-1 -> LUMO   | 0.69492         |                |             |
| S <sub>4</sub> | 3.4753        | 356.76        | 0.6292 | HOMO-1 -> LUMO+1 | 0.68740         | HOMO -> LUMO+1 | -0.14767    |
| S <sub>5</sub> | 3.7653        | 329.28        | 0.0012 | HOMO-1 -> LUMO+2 | -0.23373        | HOMO -> LUMO+2 | 0.65792     |
| S <sub>6</sub> | 3.8453        | 322.43        | 0.0010 | HOMO-1 -> LUMO+3 | 0.31705         | HOMO-> LUMO+6  | 0.28315     |
|                |               |               |        | HOMO -> LUMO+3   | 0.52692         |                |             |
| S <sub>7</sub> | 3.8503        | 322.01        | 0.0026 | HOMO-1 -> LUMO+3 | -0.17119        | HOMO -> LUMO+3 | -0.17360    |
|                |               |               |        | HOMO-1 -> LUMO+4 | 0.28926         | HOMO -> LUMO+4 | 0.48481     |
|                |               |               |        | HOMO -> LUMO+6   | 0.29175         |                |             |

|                 |        |        |        |                    |          |                    |          |
|-----------------|--------|--------|--------|--------------------|----------|--------------------|----------|
| S <sub>8</sub>  | 3.8593 | 321.26 | 0.0098 | HOMO-1 -> LUMO+3   | -0.15760 | HOMO-1 -> LUMO+4   | -0.22194 |
|                 |        |        |        | HOMO-1 -> LUMO+6   | -0.13143 | HOMO-1 -> LUMO+7   | 0.12850  |
|                 |        |        |        | HOMO-> LUMO+3      | -0.12863 | HOMO -> LUMO+4     | -0.27049 |
|                 |        |        |        | HOMO -> LUMO+5     | 0.10577  | HOMO -> LUMO+6     | 0.41713  |
|                 |        |        |        | HOMO -> LUMO+7     | 0.25743  |                    |          |
| S <sub>9</sub>  | 3.8729 | 320.13 | 0.0063 | HOMO-7 -> LUMO     | -0.10595 | HOMO-1 -> LUMO+4   | 0.12814  |
|                 |        |        |        | HOMO-1 -> LUMO+7   | 0.24276  | HOMO -> LUMO+4     | 0.16084  |
|                 |        |        |        | HOMO -> LUMO+5     | 0.21974  | HOMO -> LUMO+6     | -0.19395 |
|                 |        |        |        | HOMO -> LUMO+7     | 0.49135  |                    |          |
| S <sub>10</sub> | 3.8741 | 320.04 | 0.0010 | HOMO-1-> LUMO+5    | -0.30653 | HOMO-> LUMO+7      | -0.18818 |
|                 |        |        |        | HOMO-1 -> LUMO+5   | 0.59463  |                    |          |
| T <sub>1</sub>  | 2.4341 | 509.37 | 0.0000 | HOMO-1 -> LUMO+1   | -0.34805 | HOMO -> LUMO+1     | 0.54171  |
| T <sub>2</sub>  | 2.4386 | 508.43 | 0.0000 | HOMO-1 -> LUMO     | 0.49452  | HOMO -> LUMO       | 0.41717  |
| T <sub>3</sub>  | 3.0739 | 403.34 | 0.0000 | HOMO-6 -> LUMO     | 0.18189  | HOMO-3 -> LUMO+1   | -0.13613 |
|                 |        |        |        | HOMO-1 -> LUMO+9   | -0.13963 | HOMO-2 -> LUMO     | 0.37266  |
|                 |        |        |        | HOMO-1 -> LUMO+15  | 0.18113  | HOMO-1 -> LUMO+16  | 0.11506  |
|                 |        |        |        | HOMO-1 -> LUMO+19  | -0.10340 | HOMO -> LUMO+9     | -0.19080 |
|                 |        |        |        | HOMO -> LUMO+15    | 0.14998  |                    |          |
| T <sub>4</sub>  | 3.0851 | 401.88 | 0.0000 | HOMO-8 -> LUMO+1   | 0.13579  | HOMO-5 -> LUMO+1   | 0.16244  |
|                 |        |        |        | HOMO-3 -> LUMO+1   | 0.34547  | HOMO-2 -> LUMO     | 0.15266  |
|                 |        |        |        | HOMO-1 -> LUMO+9   | -0.15643 | HOMO-1 -> LUMO+12  | 0.14227  |
|                 |        |        |        | HOMO-1 -> LUMO+14  | -0.10733 | HOMO -> LUMO+12    | -0.20387 |
|                 |        |        |        | HOMO -> LUMO+14    | 0.16766  | HOMO-> LUMO+19     | -0.11279 |
| T <sub>5</sub>  | 3.2989 | 375.83 | 0.0000 | HOMO-1 -> LUMO     | -0.42943 | HOMO -> LUMO       | 0.54762  |
| T <sub>6</sub>  | 3.3744 | 367.43 | 0.0000 | HOMO-1 -> LUMO+1   | 0.56690  | HOMO-> LUMO+1      | 0.38652  |
| T <sub>7</sub>  | 3.4291 | 361.56 | 0.0000 | HOMO-1 -> LUMO+5   | 0.11827  | HOMO-1 -> LUMO+5   | 0.13436  |
|                 |        |        |        | HOMO-1 -> LUMO+7   | 0.41830  | HOMO-1 -> LUMO+7   | 0.45851  |
|                 |        |        |        | HOMO-> LUMO        | 0.10204  |                    |          |
| T <sub>8</sub>  | 3.4465 | 359.74 | 0.0000 | HOMO-1 -> LUMO+6   | -0.25969 | HOMO-> LUMO+1      | 0.15028  |
|                 |        |        |        | HOMO-1 -> LUMO+6   | 0.52518  | HOMO -> LUMO+14    | 0.13957  |
| T <sub>9</sub>  | 3.5862 | 345.73 | 0.0000 | HOMO-19 -> LUMO+10 | -0.12617 | HOMO-22 -> LUMO+15 | -0.10062 |
|                 |        |        |        | HOMO-22 -> LUMO+21 | 0.14117  | HOMO-22 -> LUMO+22 | 0.11423  |
|                 |        |        |        | HOMO-18 -> LUMO+3  | -0.19923 | HOMO-17 -> LUMO+3  | -0.23961 |
|                 |        |        |        | HOMO-16 -> LUMO+3  | -0.18421 | HOMO-14 -> LUMO+9  | 0.13427  |
|                 |        |        |        | HOMO-14 -> LUMO+21 | 0.12858  | HOMO-14 -> LUMO+22 | 0.11135  |
|                 |        |        |        | HOMO-4 -> LUMO+10  | 0.11135  | HOMO-14 -> LUMO+10 | 0.10062  |
|                 |        |        |        | HOMO-12 -> LUMO+10 | 0.12729  |                    |          |
|                 |        |        |        |                    |          |                    |          |
| T <sub>10</sub> | 3.5902 | 345.34 | 0.0000 | HOMO-28 -> LUMO+8  | -0.15926 | HOMO-23 -> LUMO+14 | -0.12712 |
|                 |        |        |        | HOMO-23 -> LUMO+20 | 0.16556  | HOMO-20 -> LUMO+2  | -0.31544 |
|                 |        |        |        | HOMO-19 -> LUMO+6  | -0.12538 | HOMO-19 -> LUMO+12 | 0.10589  |
|                 |        |        |        | HOMO-19 -> LUMO+20 | 0.18020  | HOMO-18 -> LUMO+2  | -0.18641 |
|                 |        |        |        | HOMO-8 -> LUMO+8   | -0.16665 | HOMO-5 -> LUMO+8   | 0.11757  |
|                 |        |        |        | HOMO-3 -> LUMO+8   | 0.12214  | HOMO -> LUMO+2     | -0.11399 |
|                 |        |        |        | HOMO -> LUMO+8     | -0.11749 |                    |          |
|                 |        |        |        |                    |          |                    |          |



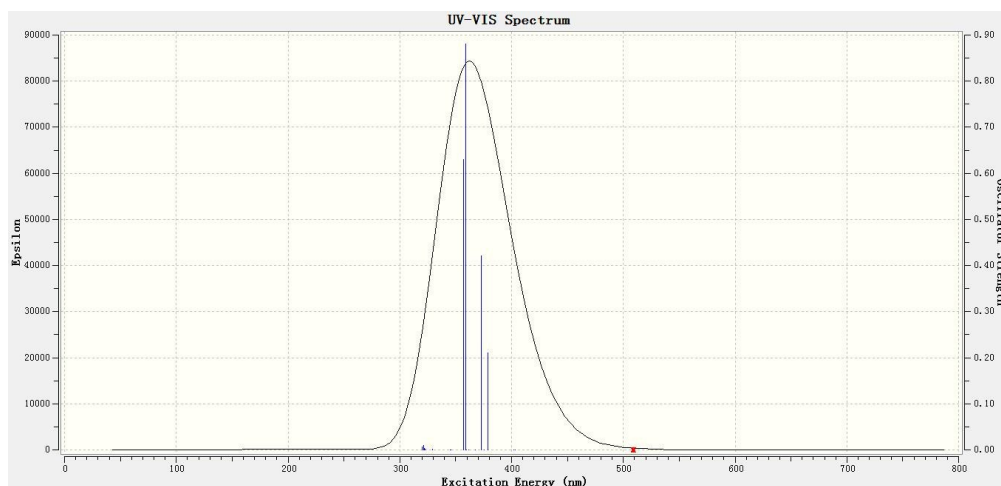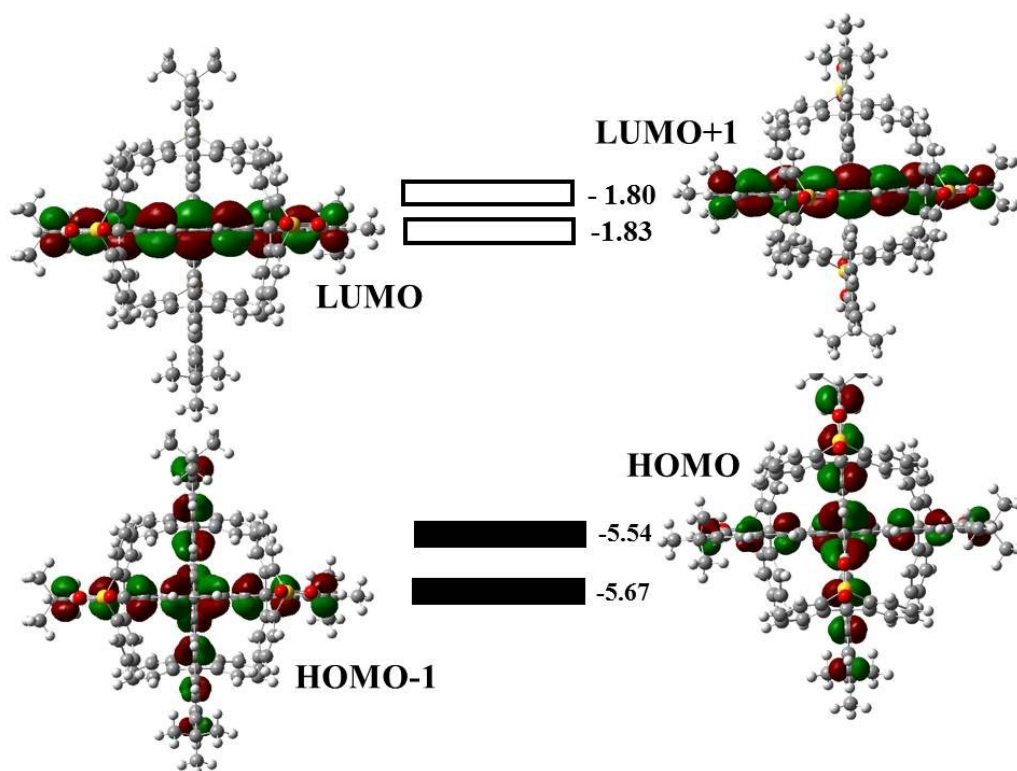

| Excited State 1           | Excited State 2           | Excited State 3           | Excited State 4           |
|---------------------------|---------------------------|---------------------------|---------------------------|
| Energy: 3.27 eV           | Energy: 3.33 eV           | Energy: 3.45 eV           | Energy: 3.47 eV           |
| Wavelength: 378.80 nm     | Wavelength: 372.77 nm     | Wavelength: 358.99 nm     | Wavelength: 356.76 nm     |
| Oscillator strength: 0.21 | Oscillator strength: 0.42 | Oscillator strength: 0.88 | Oscillator strength: 0.63 |
| Configurations:           | Configurations:           | Configurations:           | Configurations:           |
| HOMO-1→LUMO               | HOMO-1→LUMO+1             | HOMO-1→LUMO               | HOMO-1→LUMO+1             |
| HOMO→LUMO                 | HOMO→LUMO+1               |                           | HOMO→LUMO+1               |

**Figure S5.** Calculated absorption spectrum of **Spiro-4SO2** (up).Molecular orbitals and their energy levels (in eV) of **Spiro-4SO2**, as well as some major excitations calculated by TD-DFT at the B3LYP6-31G(d) level.

# HR-Mass spectra

## Elemental Composition Report

### Single Mass Analysis

Tolerance = 30.0 PPM / DBE: min = -1.5, max = 200.0

Isotope cluster parameters: Separation = 1.0 Abundance = 1.0%

Monoisotopic Mass, Odd and Even Electron Ions

5 formula(e) evaluated with 1 results within limits (up to 50 closest results for each mass)

Xia, Spiro-S

ESI20444 20 (0.515) AM (Top,4, Ar,8000.0,922.36,1.00,LS 5); Sm (Mn, 2x1.00); Sb (1,40.00); Cm (10:38)

1: TOF MS ES+  
406

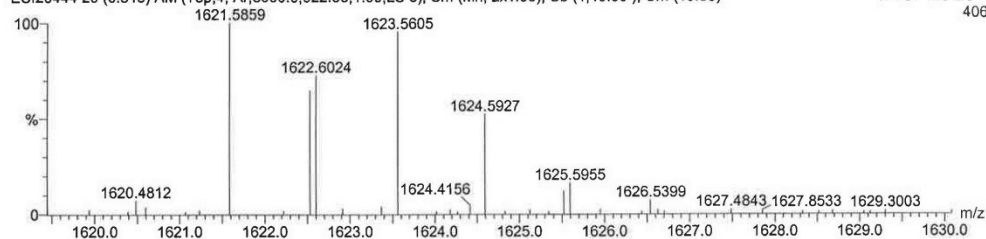

Minimum:

Maximum: 200.0 30.0 -1.5

Mass Calc. Mass mDa PPM DBE Score Formula

| Mass      | Calc. Mass | mDa | PPM | DBE  | Score | Formula     |
|-----------|------------|-----|-----|------|-------|-------------|
| 1621.5859 | 1621.5847  | 1.2 | 0.7 | 73.5 | 1     | C117 H89 S4 |

Figure S6. High-resolution MALDI mass spectrum of Spiro-4S.

## Elemental Composition Report

### Single Mass Analysis

Tolerance = 30.0 PPM / DBE: min = -1.5, max = 200.0

Isotope cluster parameters: Separation = 1.0 Abundance = 1.0%

Monoisotopic Mass, Odd and Even Electron Ions

18 formula(e) evaluated with 4 results within limits (up to 50 closest results for each mass)

Xia, Spiro-SO2

ESI20453 34 (0.872) AM (Top,4, Ar,8000.0,1971.61,1.00,LS 5); Sm (Mn, 2x1.00); Sb (1,40.00); Cm (31:68)

1: TOF MS ES+  
125

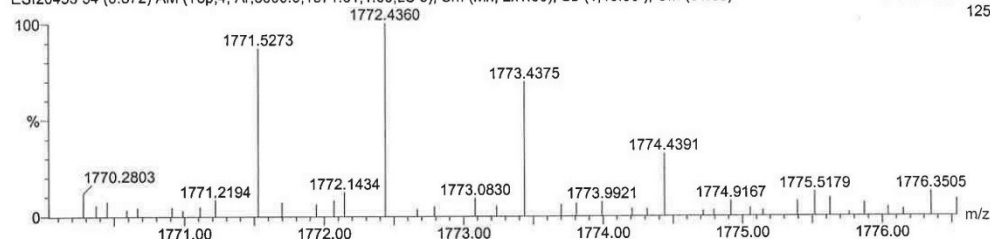

Minimum:

Maximum: 200.0 30.0 -1.5

Mass Calc. Mass mDa PPM DBE Score Formula

| Mass      | Calc. Mass | mDa   | PPM  | DBE  | Score | Formula              |
|-----------|------------|-------|------|------|-------|----------------------|
| 1771.5273 | 1771.5260  | 1.3   | 0.7  | 73.5 | 3     | C117 H88 O8 23Na S4  |
|           | 1771.5437  | -16.4 | -9.3 | 73.5 | 4     | C117 H88 O10 23Na S3 |
|           | 1771.5082  | 19.1  | 10.8 | 73.5 | 2     | C117 H88 O6 23Na S5  |
|           | 1771.4905  | 36.8  | 20.8 | 73.5 | 1     | C117 H88 O4 23Na S6  |

Figure S7. High-resolution MALDI mass spectrum of Spiro-4SO2.

# $^1\text{H}$ -NMR and $^{13}\text{C}$ -NMR Spectra

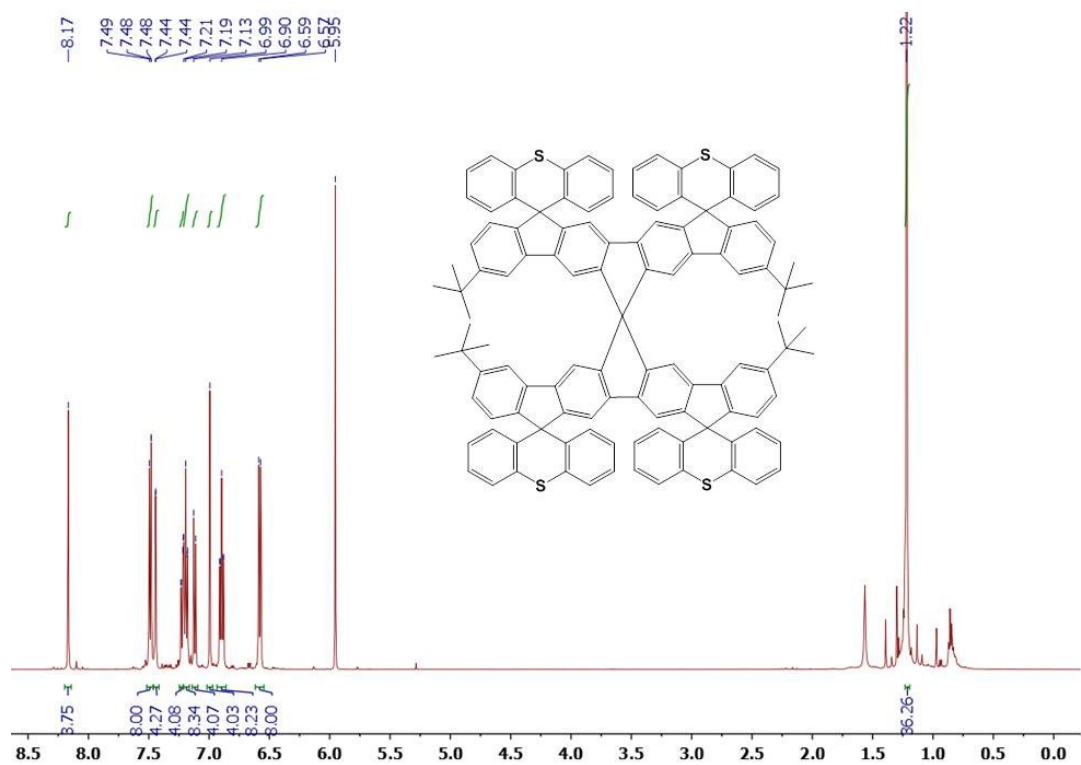

$^1\text{H}$ -NMR spectrum of Spiro-4S (298K,  $\text{C}_2\text{D}_2\text{Cl}_4$ , 500 MHz).

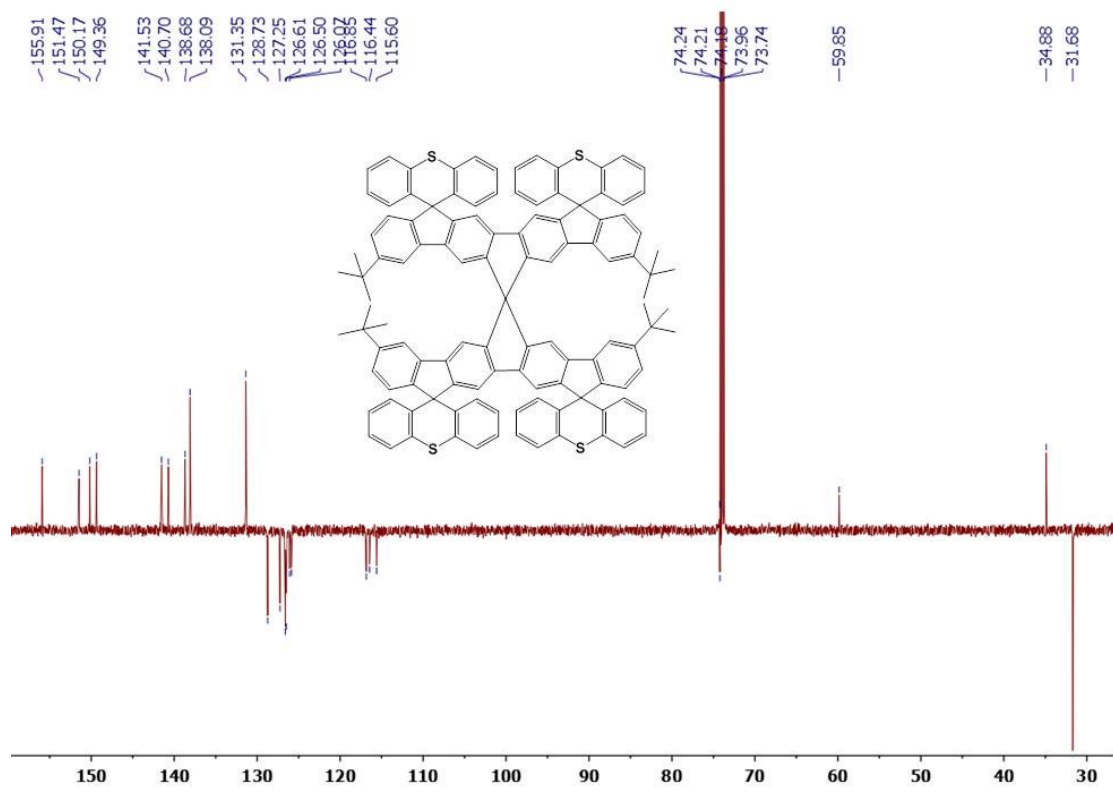

$^{13}\text{C}$ -NMR spectrum of Spiro-4S (298K,  $\text{C}_2\text{D}_2\text{Cl}_4$ , 126 MHz).

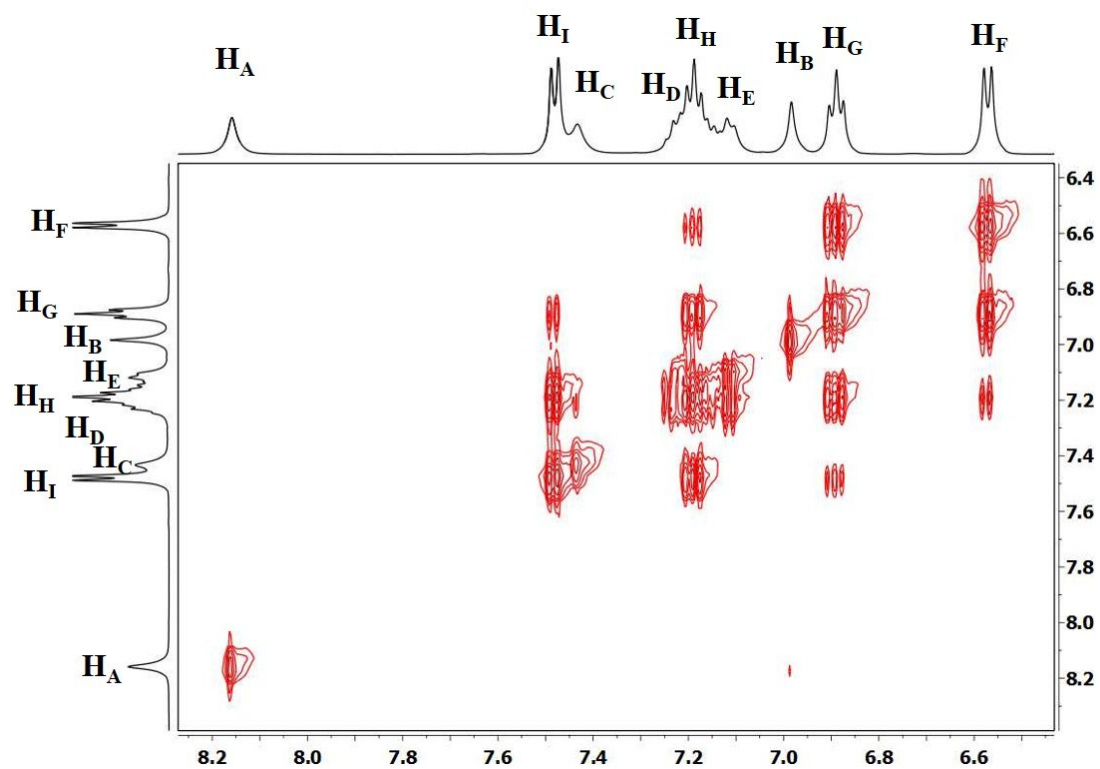

Aromatic region of H-H COSY spectrum of **Spiro-4S** (298K, C<sub>2</sub>D<sub>2</sub>Cl<sub>4</sub>, 500 MHz).

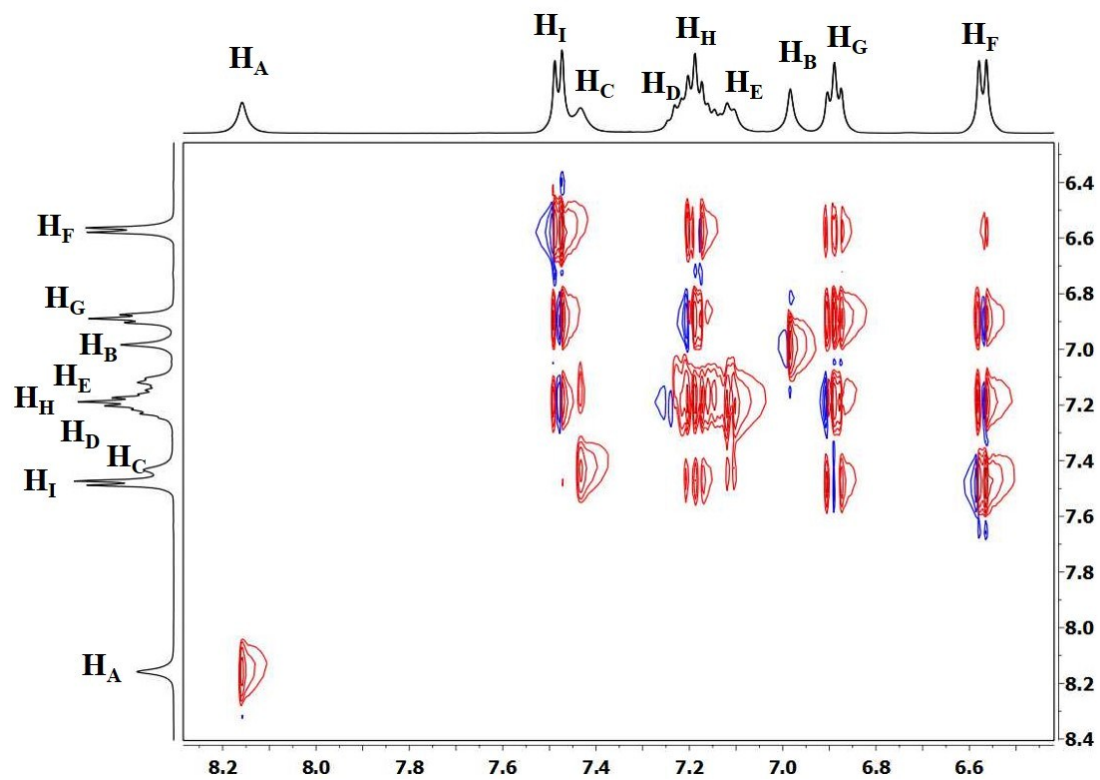

Aromatic region of H-H TOCSY spectrum of **Spiro-4S** (298K, C<sub>2</sub>D<sub>2</sub>Cl<sub>4</sub>, 500 MHz).

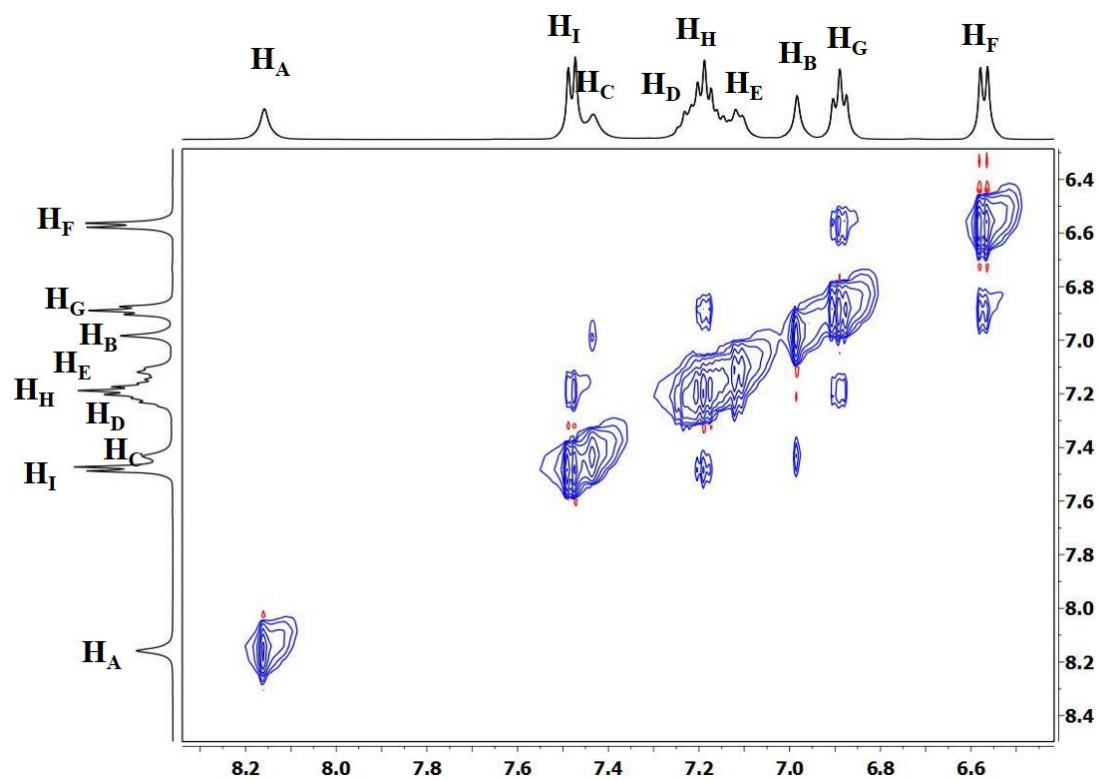

Aromatic region of H-H NOESY spectrum of **Spiro-4S** (298K,  $C_2D_2Cl_4$ , 500 MHz).

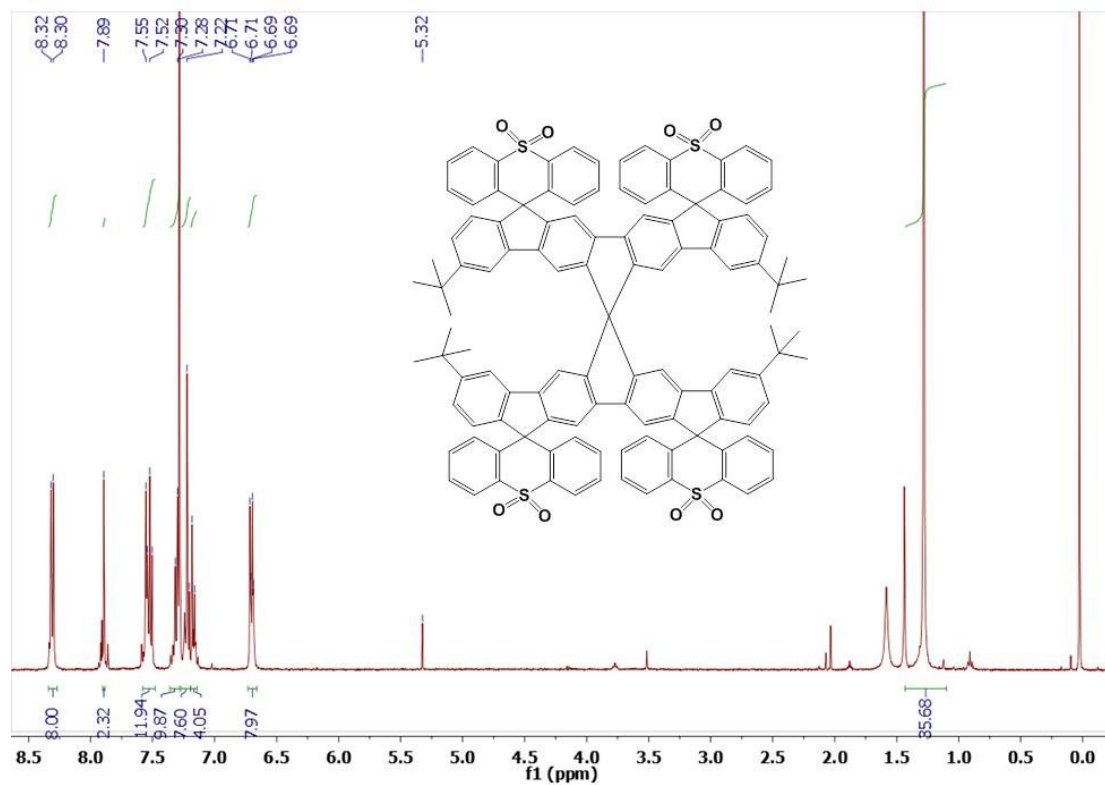

$^1H$ -NMR spectrum of **Spiro-4SO2** (298K,  $CDCl_3$ , 400 MHz).

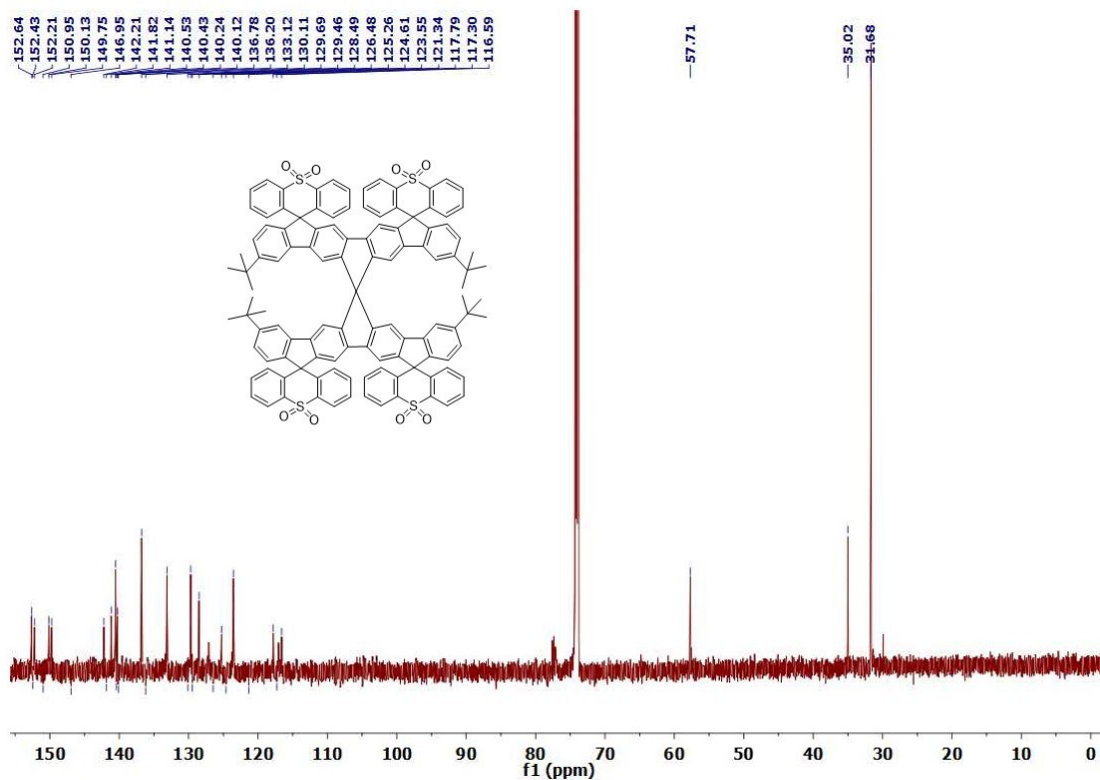

<sup>13</sup>C-NMR spectrum of Spiro-4SO<sub>2</sub> (298K, C<sub>2</sub>D<sub>2</sub>Cl<sub>4</sub>, 151 MHz).

## Single crystal structure

### Crystal structure of Spiro-4S

Cambridge Crystallographic Data Centre deposition number: CCDC 1564493

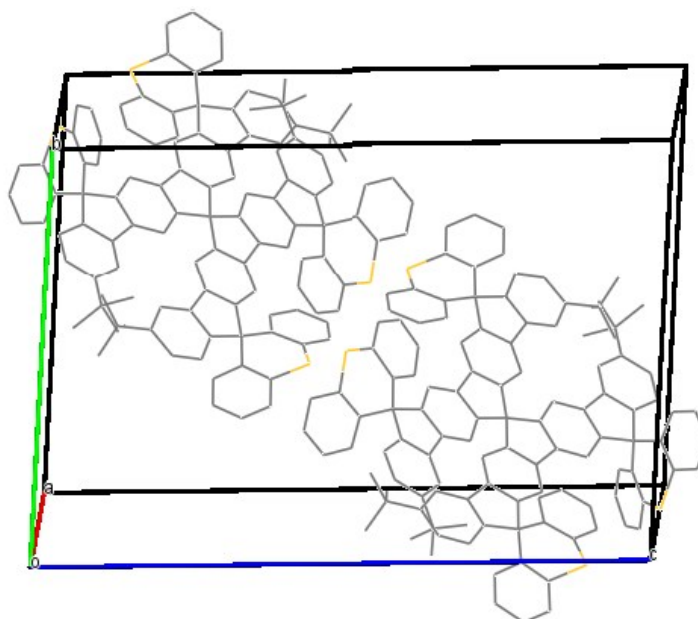

**Table S3.** Crystallographic table.

| Compound                        | <b>Spiro-4S</b>                                                                                                                         |
|---------------------------------|-----------------------------------------------------------------------------------------------------------------------------------------|
| Molecular formula               | C <sub>157</sub> H <sub>168</sub> O <sub>10</sub> S <sub>4</sub>                                                                        |
| Formula weight                  | 2343.14 gmol <sup>-1</sup>                                                                                                              |
| Absorption coefficient          | $\mu = 0.135 \text{ mm}^{-1}$                                                                                                           |
| Crystal size                    |                                                                                                                                         |
| Space group                     | P-1 (triclinic)                                                                                                                         |
| Lattice parameters              | a = 15.9701(10) Å    alpha = 86.261(4) deg.<br>b = 17.8188(8) Å    beta = 87.234(4) deg.<br>c = 25.3977(11) Å    gamma = 63.893(5) deg. |
| Volume                          | 6474.6(6) Å <sup>3</sup>                                                                                                                |
| Z value                         | 2                                                                                                                                       |
| F (000)                         | 2508.0                                                                                                                                  |
| Calculated density              | $d_{\text{xray}} = 1.202 \text{ mg/m}^3$                                                                                                |
| Temperature                     | 173.0 K                                                                                                                                 |
| Theta range for data collection | 2.9° < $\theta$ < 25.3°                                                                                                                 |
| Limiting indices                | -19 ≤ h ≤ 19, -21 ≤ k ≤ 21, -30 ≤ l ≤ 30                                                                                                |
| Total number of reflections     | 63701                                                                                                                                   |
| Unique number of reflections    | 23660 (R <sub>int</sub> = 0.0571)                                                                                                       |
| Refinement method               | Full-matrix least-squares on F <sup>2</sup>                                                                                             |
| Final R indices [I > 2sigma(I)] | R1 = 0.1217, wR2 = 0.3276                                                                                                               |
| R indices (all data)            | R1 = 0.1912, wR2 = 0.3935                                                                                                               |
| Goodness of fit                 | S = 1.206                                                                                                                               |
| Largest diff. peak and hole     | 2.135 and -0.551 eÅ <sup>-3</sup>                                                                                                       |



## Crystal structure of Spiro-4SO2

Cambridge Crystallographic Data Centre deposition number: CCDC 1564494

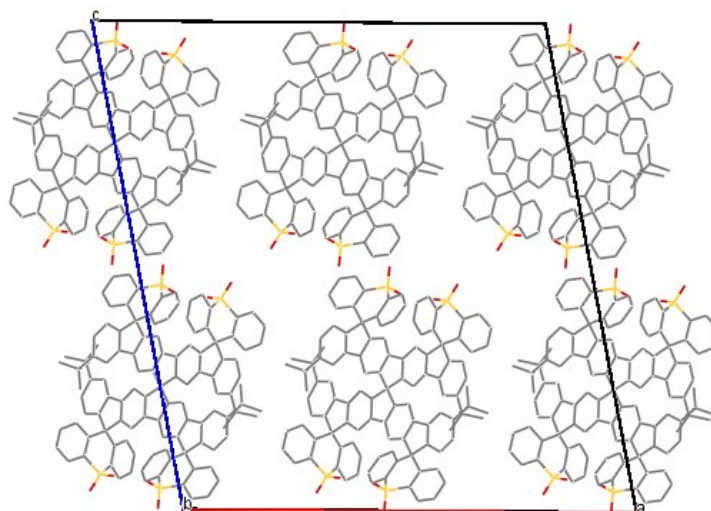

**Table S4.** Crystallographic table.

| Compound                             | <b>Spiro-4SO2</b>                                                                                                                                                                    |
|--------------------------------------|--------------------------------------------------------------------------------------------------------------------------------------------------------------------------------------|
| Molecular formula                    | $C_{133}H_{104}Cl_{32}O_8S_4$                                                                                                                                                        |
| Formula weight                       | 3092.80 $g\ mol^{-1}$                                                                                                                                                                |
| Absorption coefficient               | $\mu = 0.514\ mm^{-1}$                                                                                                                                                               |
| Space group                          | C 1 2/ c 1 (monoclinic)                                                                                                                                                              |
| Lattice parameters                   | $a = 31.7737(8)\ \text{\AA}$ $\alpha = 90\ \text{deg.}$<br>$b = 18.4299(6)\ \text{\AA}$ $\beta = 101.028(2)\ \text{deg.}$<br>$c = 34.7940(6)\ \text{\AA}$ $\gamma = 90\ \text{deg.}$ |
| Volume                               | $19998.6(9)\ \text{\AA}^3$                                                                                                                                                           |
| Z value                              | 4                                                                                                                                                                                    |
| F (000)                              | 6296                                                                                                                                                                                 |
| Calculated density                   | $d_{xray} = 1.027\ mg/m^3$                                                                                                                                                           |
| Temperature                          | 173.0 K                                                                                                                                                                              |
| Theta range for data collection      | $3.1^\circ < \theta < 25.0^\circ$                                                                                                                                                    |
| Limiting indices                     | $-37 \leq h \leq 34, -21 \leq k \leq 19, -41 \leq l \leq 41$                                                                                                                         |
| Total number of reflections          | 36447                                                                                                                                                                                |
| Unique number of reflections         | 17507 ( $R_{int} = 0.0365$ )                                                                                                                                                         |
| Refinement method                    | Full-matrix least-squares on $F^2$                                                                                                                                                   |
| Final R indices [ $I > 2\sigma(I)$ ] | $R1 = 0.1438, wR2 = 0.4203$                                                                                                                                                          |
| R indices (all data)                 | $R1 = 0.1836, wR2 = 0.4561$                                                                                                                                                          |
| Goodness of fit                      | $S = 1.612$                                                                                                                                                                          |
| Largest diff. peak and hole          | 1.585 and $-0.874\ e\ \text{\AA}^{-3}$                                                                                                                                               |
